# Supplementary material
Source: publisher figshare collection journal article supplement (https://acs.figshare.com/ndownloader/files/5805783)
Supplement: Supplementary file 1 [file 5805783]

#### Terms & Conditions

Electronic Supporting Information files are available without a subscription to ACS Web Editions. The American Chemical Society holds a copyright ownership interest in any copyrightable Supporting Information. Files available from the ACS website may be downloaded for personal use only. Users are not otherwise permitted to reproduce, republish, redistribute, or sell any Supporting Information from the ACS website, either in whole or in part, in either machine-readable form or any other form without permission from the American Chemical Society. For permission to reproduce, republish and redistribute this material, requesters must process their own requests via the RightsLink permission system. Information about how to use the RightsLink permission system can be found at <http://pubs.acs.org/page/copyright/permissions.html>

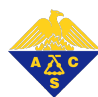

ACS Publications

MOST TRUSTED. MOST CITED. MOST READ.

Copyright © 1998 American Chemical Society

### *General Procedure for the preparation of Oximes from Ketones*

Following a standard protocol,<sup>1</sup> sodium acetate (330 mmol) was added to a suspension of hydroxylamine hydrochloride (330 mmol) in methanol (150 ml). After allowing to stir for 0.5 h, ketone (300 mmol) was added dropwise (either as a neat liquid or as a solution in methanol) over 1.5 h. The mixture then was allowed to stir for 2-8 h until the reaction was complete (monitored disappearance of ketone and appearance of oxime by GC). Water (150 ml) was added dropwise over 1 h and then the resultant suspension was stirred for a further 1 h, filtered and the solid precipitate was washed with water and dried under vacuum to afford the ketoxime, typically in >90% yield. This same procedure was employed for all entries in this manuscript.

### *Procedures for the preparation of Novel Enamides from Oximes*

#### *N*-(1-*tert*-Butyl-vinyl)-acetamide

Acetic anhydride (398 g, 3.9 mol) was added, in portions, to a solution of pinacolone oxime (150 g, 1.3 mol) in toluene (1 L) under a nitrogen atmosphere. Acetic acid (234 g, 3.9 mol) was then added, followed by Fe powder (Aldrich; 325 mesh) (145.2 g, 2.6 mol). The mixture was then heated to 70 °C for 4 h. The reaction was then cooled to room temperature and filtered through celite to remove solid residues, which were then washed with toluene (2 x 100 ml). The combined filtrates were cooled in an ice-bath and washed with 2M NaOH (2 x 1 L). The organic phase was separated, dried (MgSO<sub>4</sub>) and evaporated to afford the desired enamide (104 g, 57% yield) as a colorless solid of suitable purity for the subsequent asymmetric hydrogenation process.

<sup>1</sup>H-NMR (CDCl<sub>3</sub>): δ 6.48 (s, 1H), 5.63 (s, 1H), 4.80 (s, 1H), 2.10 (s, 3H), 1.13 (s, 9H).

<sup>13</sup>C-NMR (CDCl<sub>3</sub>): δ 168.85 (CO), 147.97 (CCH<sub>2</sub>), 98.94 (CCH<sub>2</sub>), 35.26 ((CH<sub>3</sub>)<sub>3</sub>C), 28.31 ((CH<sub>3</sub>)<sub>3</sub>C), 24.72 (CH<sub>3</sub>CO).

#### *N*-(1-Adamantan-1-yl-vinyl)-acetamide

Acetic anhydride (7.8 g, 76.4 mmol), followed by acetic acid (4.3 g, 76.4 mmol), was added to a solution of the 1-adamantylmethylketone oxime (5.0 g, 25.9 mmol) in toluene (50 ml), under a nitrogen atmosphere. Fe powder (Aldrich; 325 mesh) (2.9 g, 51.6 mmol) was then added and the mixture heated to 70 °C for 8 h. The reaction was then cooled to room temperature and filtered through celite to remove solid residues which subsequently were washed with toluene (2 x 10 ml). The combined filtrates were cooled in an ice-bath and washed with 2M NaOH (2 x 50 ml). The organic phase was separated, dried (MgSO<sub>4</sub>) and evaporated to give an oily residue. This was purified by column chromatography (SiO<sub>2</sub> 60-mesh, 30g)

(25 % EtOAc in pentane as eluent) to afford the desired enamide as a colorless solid (2.42 g, 43% yield).

<sup>1</sup>H-NMR (CDCl<sub>3</sub>): δ 6.50 (s, 1H), 5.64 (s, 1H) 4.76 (s, 1H) 1.5 - 2.2 (m, 18H).

<sup>13</sup>C-NMR (CDCl<sub>3</sub>): 168.79 (CO), 148.27 (CCH<sub>2</sub>), 99.21 (CCH<sub>2</sub>), 46.50 (C), 40.24 (CH<sub>2</sub>), 36.58 (CH<sub>2</sub>), 28.23 (CH), 24.33 (CH<sub>3</sub>CO).

### ***N*-(3,4-Dihydro-naphthalen-1-yl)-acetamide**

Acetic anhydride (85.0 g, 837 mmol), followed by acetic acid (50.3 g, 837 mmol), was added to a solution of the 1-tetralone oxime (45.0 g, 279 mmol) in toluene (400 ml), under a nitrogen atmosphere. Fe powder (Aldrich; 325 mesh) (31.2 g, 558 mmol) was then added and the mixture heated to 70 °C for 4 h. The reaction was cooled to 40 °C and filtered through celite to remove solid residues which were then washed with toluene (2 x 50 ml). The combined filtrates were diluted with dichloromethane (500 ml) and the mixture cooled in an ice-bath and washed with 2M NaOH (2 x 300 ml). The organic phase was then separated, dried (MgSO<sub>4</sub>) and evaporated to volume of 300 ml from which a solid crystallised. The the precipitate was filtered to afford directly the desired enamide as an off-white solid (28.0 g, 54% yield).

<sup>1</sup>H-NMR (CDCl<sub>3</sub>) (3 : 1 mixture of rotamers): δ 7.05 - 7.30 (m, 4H), 6.84 (brs, 0.75H), 6.70 (brs, 0.25H), 6.44 (brt, 0.75H), 5.98 (brt, 0.25H), 2.68 - 2.88 (m, 2H), 2.24 - 2.48 (m, 2H), 2.18 (s, 2.25H), 1.96 (s, 0.75H).

<sup>13</sup>C-NMR (CD<sub>3</sub>OD): 172.81 (CO), 137.69 (CN), 133.62 (C-bridge head), 132.95 (C-bridge head), 128.53 (CH), 128.49 (CH), 127.30 (CH), 123.00 (CH), 122.87 (CH), 28.46 (CH<sub>2</sub>), 23.37 (CH<sub>2</sub>), 23.05 (CH<sub>3</sub>).

### ***N*-(3*H*-Inden-1-yl)-acetamide**

Acetic anhydride (10.4 g, 102 mmol), followed by acetic acid (6.1 g, 102 mmol), was added to a solution of the 1-indanone oxime (5.0 g, 34 mmol) in toluene (50 ml), under a nitrogen atmosphere. Fe powder (Aldrich; 325 mesh) (3.8 g, 68 mmol) was then added and the mixture heated to 70 °C for 0.25 h. The reaction was then cooled to room temperature and filtered through celite to remove solid residues which subsequently were washed with toluene (2 x 10 ml). The combined filtrates were cooled in an ice-bath and washed with 2M NaOH (2 x 50 ml). The organic phase was then separated, dried (MgSO<sub>4</sub>) and evaporated to afford a residue. This was purified by column chromatography (SiO<sub>2</sub> 60-mesh, 100g) (40% EtOAc in pentane as eluent) to afford the desired enamide as a tan solid (1.80 g, 30% yield).

<sup>1</sup>H-NMR (CDCl<sub>3</sub>): δ 7.40 - 7.56 (m, 2H), 7.16 - 7.34 (m, 3H), 6.88 (brt, 1H), 3.44 (m, 2H), 2.25 (s, 3H).

$^{13}\text{C}$ -NMR ( $\text{CDCl}_3$ ): 168.60 (CO), 142.84 (CN), 139.64 (C-bridge head), 135.32 (C-bridge head), 125.99 (CH), 125.44 (CH), 124.31 (CH), 115.99 (CH), 115.73 (CH), 36.57 ( $\text{CH}_2$ ), 24.22 ( $\text{CH}_3$ ).

### *N*-(2-Methyl-1-phenyl-propenyl)-acetamide

Acetic anhydride (9.4 g, 91.8 mmol), followed by acetic acid (5.5 g, 91.8 mmol), was added to a solution of the isobutyrophenone oxime (5.0 g, 30.6 mmol) in toluene (50 ml), under a nitrogen atmosphere. Fe powder (Aldrich; 325 mesh) (3.42 g, 558 mmol) was then added and the mixture heated to 70 °C for 4 h. The reaction was then cooled to room temperature and filtered through celite to remove solid residues which subsequently were washed with toluene (2 x 10 ml). The combined filtrates were cooled in an ice-bath and washed with 2M NaOH (2 x 50 ml). The organic phase was then separated, dried ( $\text{MgSO}_4$ ) and evaporated to volume of 15 ml, heptane (15 ml) was added to induce crystallisation. The resultant solid was filtered to afford the enamide as a white solid (3.43 g, 60%).

$^1\text{H}$  -NMR ( $\text{CDCl}_3$ ) (3 : 1 mixture of rotamers):  $\delta$  7.20 - 7.45 (m, 5H) 6.76 (brs, 0.25H), 6.66 (brs, 0.75H), 2.05 (s, 2.25H), 1.70 - 1.94 (m, 6.25H).

$^{13}\text{C}$ -NMR ( $\text{CD}_3\text{OD}$ ): 171.83 (CO), 140.20 (CN), 131.09 (Ar), 130.27 (Ar), 129.74 ( $\text{C}(\text{CH}_3)_2$ ), 129.02 (Ar), 128.25 (Ar), 22.70 ( $\text{CH}_3\text{CO}$ ), 21.27 and 20.85 ( $\text{C}(\text{CH}_3)_2$ ).

### *Procedure for the Asymmetric Catalytic Hydrogenation of Enamides*

#### Preparation of *N*-(3,3-Dimethyl-2-butyl)-acetamide

*N*-(1-*tert*-Butyl-vinyl)-acetamide (0.5 g, 3.56 mmol) and [((*S,S*)-Me-DuPHOS)-Rh-(COD)] $\text{BF}_4$  (4.2 mg, 0.2 mol%) were placed in a glass lined 50 ml pressure vessel, which was then purged with hydrogen (200 psi x 3). Degassed methanol (10 ml, sparged with nitrogen for 2 h) was then added and the vessel further purged with hydrogen (200 psi x 2) and charged to 200 psi hydrogen. After stirring for 20 h the reaction mixture was evaporated to afford a residue. This residue was dissolved in EtOAc (5 ml) and the solution filtered through a short silica plug to remove catalyst residues. The solvent was then evaporated to afford (*R*)-*N*-(3,3-dimethyl-2-butyl)-acetamide (0.47 g, 95% yield) as a colorless solid. Absolute stereochemical assignment was achieved by comparison of the sign of optical rotation and chiral gc elution order with a standard sample prepared by acetylation of authentic (*R*)-3,3-dimethyl-2-aminobutane (commercially available; Lancaster Chemicals) using  $\text{Ac}_2\text{O}$ /pyridine.

$[\alpha]_D^{20} = -2.9$  (c 1.0, MeOH).

Enantiomeric excess: >99% by chiral GC (see gc trace below).

<sup>1</sup>H-NMR (CDCl<sub>3</sub>): δ 5.51 (d, <sup>3</sup>J = 9.8 Hz, 1H), 3.88 (dq, <sup>33</sup>J = 9.8 / 6.8 Hz, 1H), 2.00 (s, 3H), 1.07 (d, <sup>3</sup>J = 6.8 Hz, 3H), 0.90 (s, 9H).

<sup>13</sup>C-NMR (CDCl<sub>3</sub>): δ 169.3 (CO), 52.69 (HCN), 34.06 ((CH<sub>3</sub>)<sub>3</sub>C), 26.15 ((CH<sub>3</sub>)<sub>3</sub>C), 23.63 (CH<sub>3</sub>CO), 16.14 (CH<sub>3</sub>CH).

m.p. (determined by DSC) 81 °C [lit. 70-71 °C (racemate)]<sup>2</sup>

HRMS mass calculated: 144.13884, found 144.13858.

### Preparation of *N*-(1-Adamantan-1-yl-ethyl)-acetamide

*N*-(1-Adamantan-1-yl-vinyl)-acetamide (0.5 g, 2.28 mmol) and [((*R,R*)-Me-DuPHOS)-Rh-(COD)]BF<sub>4</sub> (2.8 mg, 0.2 mol%) are placed in a glass lined 50 ml pressure vessel, which was then purged with hydrogen (200 psi x 3). Degassed methanol (10 ml; sparged with nitrogen for 2 h) was then added and the vessel further purged with hydrogen (200 psi x 2) and charged to 200 psi hydrogen. After stirring for 20 h the reaction mixture was evaporated to afford a residue. This residue was dissolved in EtOAc (5 ml) and the solution filtered through a short silica plug to remove catalyst residues. The solvent was then evaporated to afford (*S*)-*N*-(1-adamantan-1-yl-ethyl)-acetamide (0.49 g, 97% yield) as a white solid.

Enantiomeric excess: >99% by chiral HPLC (see trace for racemate below)

<sup>1</sup>H-NMR (CDCl<sub>3</sub>): δ. 5.42 (d, <sup>3</sup>J = 10 Hz, 1H), 3.7 (dt, <sup>33</sup>J = 10 / 7 Hz, 1H), 2.15 - 1.40 (m, 18H), 1.02 (d, <sup>3</sup>J = 7 Hz, 3H).

<sup>13</sup>C-NMR (CDCl<sub>3</sub>): δ 169.45 (CO), 52.98 (HCN), 38.36 (CH<sub>2</sub>), 37.05 (CH<sub>2</sub>), 35.69 (C), 28.44 (CH), 23.65 (CH<sub>3</sub>CO), 14.57 (CH<sub>3</sub>CH).

m.p. (determined by DSC) 135 °C [lit. 135 °C (racemate)]<sup>3</sup>

HRMS mass calculated: 221.17796, found 221.17790.

### Preparation of *N*-Indan-1-yl-acetamide

*N*-(3*H*-Inden-1-yl)-acetamide (0.5 g, 2.84 mmol) and [((*S,S*)-Me-BPE)-Rh-(COD)]OTf (3.5 mg, 0.2 mol%) are placed in a glass lined 50 ml pressure vessel, which was then purged with hydrogen (200 psi x 3). Degassed methanol (10 ml; sparged with nitrogen for 2 h) was then added and the vessel further purged with hydrogen (200 psi x 2) and charged to 200 psi hydrogen. After stirring for 20 h the reaction mixture was evaporated to afford a residue. This residue was dissolved in EtOAc (5 ml) and the solution filtered through a short silica plug to remove catalyst residues. The solvent was then evaporated to afford (*S*)-*N*-Indan-1-yl-acetamide (0.49 g, 99% yield) as a tan solid. Absolute stereochemical assignment was achieved by comparison of the sign of optical rotation and chiral gc elution order with a standard sample prepared by acetylation of authentic (*S*)-1-aminoindane (commercially available; Lancaster Chemicals) using Ac<sub>2</sub>O/pyridine.

[α]<sub>D</sub><sup>20</sup> = -122.4 (c 1.0, MeOH).

Enantiomeric excess: > 99% by chiral GC (see chromatograms below)

<sup>1</sup>H-NMR (CDCl<sub>3</sub>): δ 7.16 - 7.32 (m, 4H), 5.74 (d, <sup>3</sup>J = 9 Hz, 1H), 5.48 (q, <sup>3</sup>J = 7.4 Hz, 1H), 2.98 (m, 1H), 2.87 (m, 1H), 2.62 (apparent ddt, <sup>2</sup>J = 12.9 Hz, <sup>333</sup>J = 4.4 / 7.4 / 7.5 Hz, 1H), 2.04 (s, 3H), 1.81 (apparent ddt, <sup>2</sup>J = 12.9, <sup>333</sup>J = 7.4 / 7.7 / 8.8 Hz, 1H).

<sup>13</sup>C-NMR (CDCl<sub>3</sub>): δ 169.81 (CO), 143.45 (C-bridge head), 143.11 (C-bridge head), 128.00 (Ar), 126.76 (Ar), 124.82 (Ar), 124.01 (Ar), 54.73 (HCN), 34.07 (CH<sub>2</sub>), 30.21 (CH<sub>2</sub>), 23.47 (CH<sub>3</sub>CO).

m.p. (determined by DSC) 154 °C [lit. 125-126 °C (racemate)]<sup>4</sup>

HRMS mass calculated: 175.09972, found 175.09946.

### Preparation of *N*-(1,2,3,4-Tetrahydro-naphthalen-1-yl)-acetamide

*N*-(3,4-Dihydro-naphthalen-1-yl)-acetamide (0.5 g, 2.67 mmol) was placed in a glass lined 50 ml pressure vessel, which was then purged with hydrogen (200 psi x 3). Degassed methanol (10 ml) was then added and the vessel further purged with hydrogen (200 psi x 2) and charged to 200 psi hydrogen and then cooled such that the internal temperature was 0 °C. The vessel was then vented and [((*S,S*)-Me-BPE)-Rh-(COD)]OTf (3.2 mg, 0.2 mol%) in degassed methanol (0.5 ml) added, the vessel was then repressurised to 200 psi. After stirring for 20 h the reaction mixture was evaporated to afford a residue. This residue was dissolved in EtOAc (5 ml) and the solution filtered through a short silica plug to remove catalyst residues. The solvent was then evaporated to afford (*S*)-*N*-(1,2,3,4-Tetrahydro-naphthalen-1-yl)-acetamide (0.49 g, 99%) as a tan solid.

Enantiomeric excess: 92% by chiral GC (see trace for racemate below)

<sup>1</sup>H-NMR (CDCl<sub>3</sub>): δ 7.04 - 7.30 (m, 4H), 5.87 (brd, 1H), 5.10 - 5.20 (m, 1H), 2.68 - 2.86 (m, 2H), 1.90 - 2.08 (m, 2H), 2.00 (s, 3H), 1.72 - 1.88 (m, 2H).

<sup>13</sup>C-NMR (CDCl<sub>3</sub>): δ 169.27 (CO), 137.57 (C-bridge head), 136.65 (C-bridge head), 129.15 (Ar), 128.73 (Ar), 127.26 (Ar), 126.21 (Ar), 47.42 (HCN), 30.07 (CH<sub>2</sub>), 29.20 (CH<sub>2</sub>), 23.50 (CH<sub>3</sub>), 19.88 (CH<sub>2</sub>).

m.p. (determined by DSC) 144 °C [lit. 145-146 °C (racemate)]<sup>5</sup>

HRMS mass calculated: 189.11536, found 189.11558.

**Table 1.** Oximes and enamides produced; yields are unoptimized.

| Entry | Oxime                                                                                      | Enamide                                                                                                          |
|-------|--------------------------------------------------------------------------------------------|------------------------------------------------------------------------------------------------------------------|
| 1     | 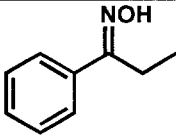<br>91%   | <br>74% ( <i>E/Z</i> mixture) |
| 2     | <br>70%   | <br>80%                       |
| 3     | <br>95%   | <br>63%                       |
| 4     | <br>95%  | <br>57%                      |
| 5     | <br>77% | <br>43% <sup>[b]</sup>      |
| 6     | <br>81% | <br>54%                     |
| 7     | <br>84% | <br>30% <sup>[b]</sup>      |
| 8     | <br>87% | <br>60%                     |

# *Analytical Methods for Enantiomeric Excess Determination*

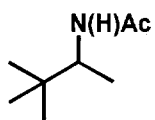

GC Conditions:

Chirasil DEX CB column - 25m x 0.25mm - 0.25 $\mu$ m film thickness

Temp program - 90°C for 15 minutes

Detection - FID at 200°C

Sample solvent - acetone

Retention times:  $t_1$  (S) - 12.79 minutes,  $t_2$  (R) - 14.18 minutes

Racemic *N*-acetyl-3,3-dimethyl-2-aminobutane

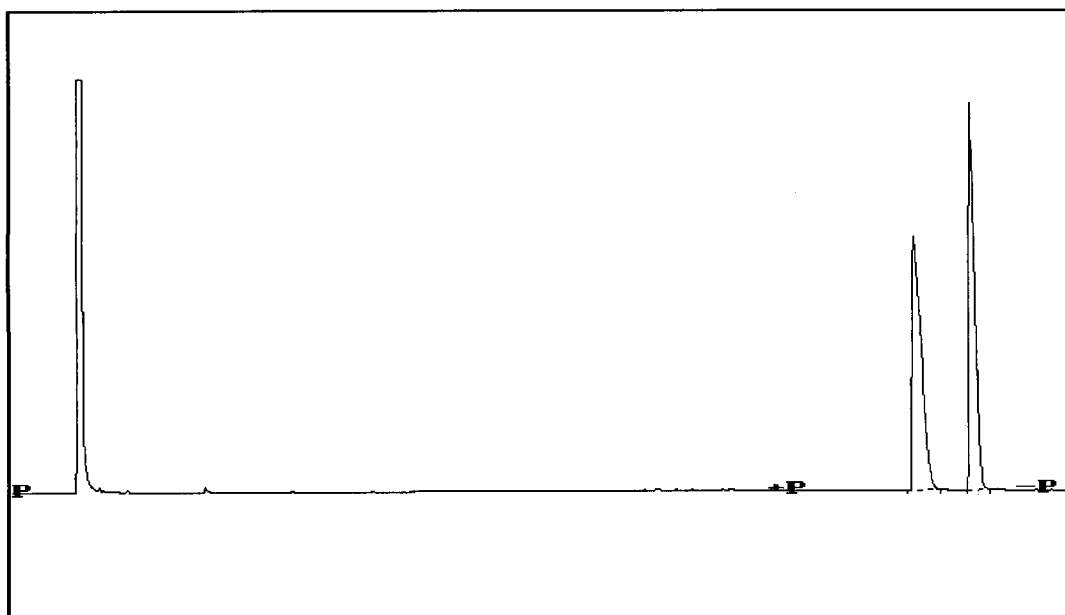

Crude product 9 (*R*)-*N*-acetyl-3,3-dimethyl-2-aminobutane obtained from (*S,S*)-Me-DuPHOS-Rh catalysed hydrogenation of the enamide 8

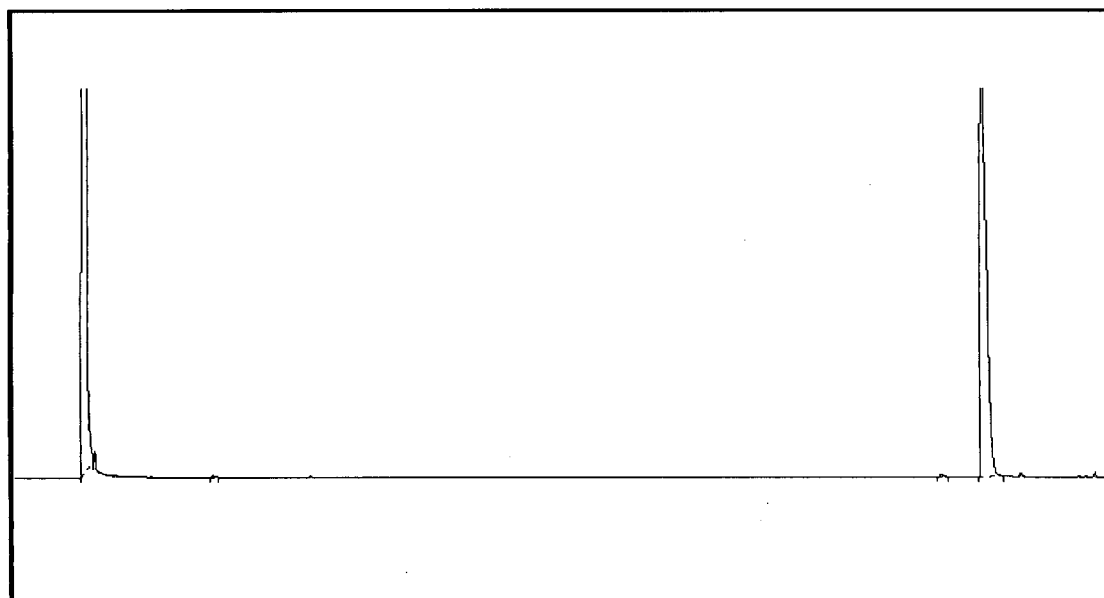



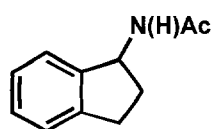

**GC Conditions:**

Chirasil DEX CB column - 25m x 0.25mm - 0.25 $\mu$ m film thickness

Temp program - 160°C for 15 minutes

Detection - FID at 200°C

Sample solvent - acetone

Retention times:  $t_1$  (*S*) - 12.21 minutes,  $t_2$  (*R*) - 13.15 minutes

**Racemic *N*-acetyl-1-aminoindane**

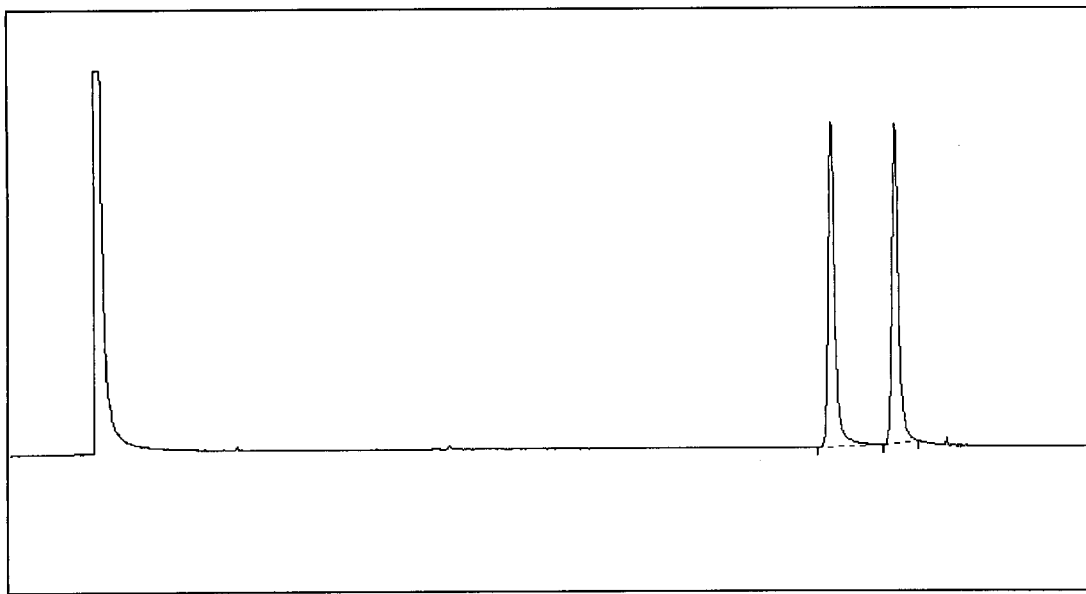

**Crude product, (*R*)-*N*-acetyl-1-aminoindane obtained from (*R,R*)-Me-BPE-Rh catalysed hydrogenation of the enamide 4**

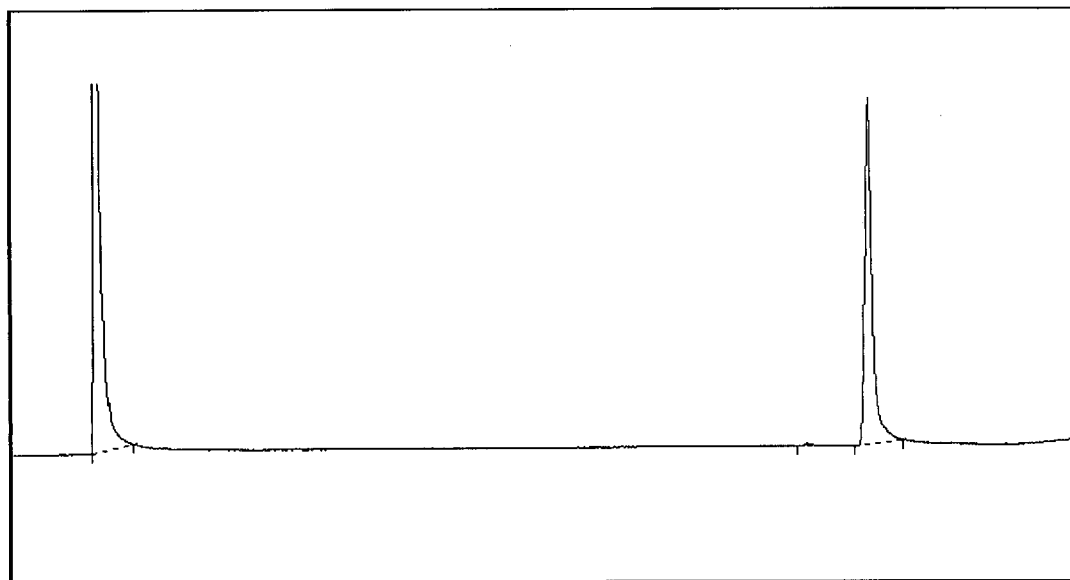

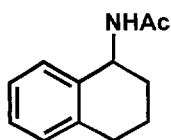

**GC Conditions:**

Chirasil DEX CB column - 25m x 0.25mm - 0.25 $\mu$ m film thickness

Temp program - 170°C for 15 minutes

Detection - FID at 200°C

Carrier gas - helium at 20 psi

Sample solvent - acetone

Retention times:  $t_1$  - 12.85 minutes,  $t_2$  - 14.43 minutes

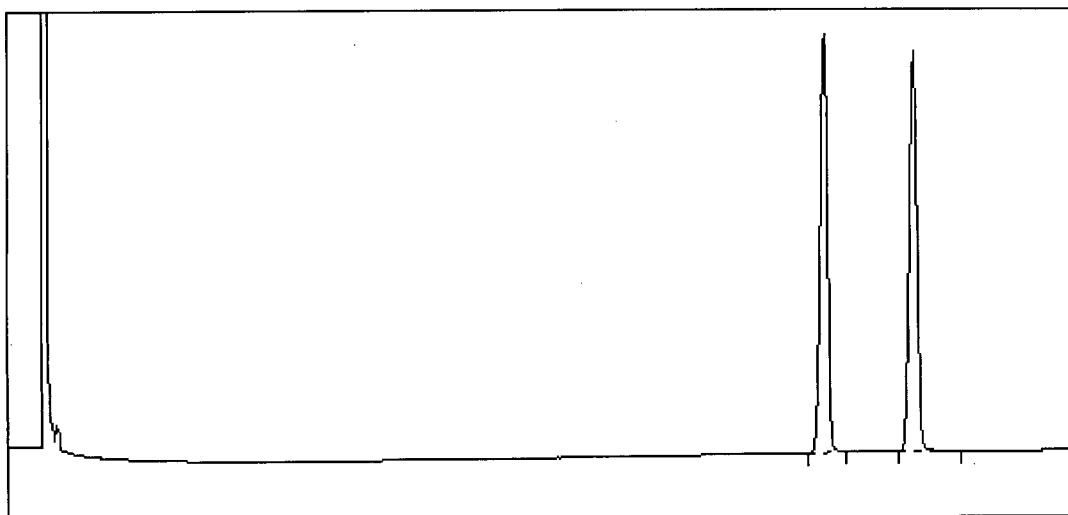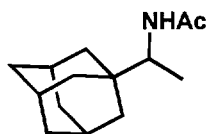

**SFC Conditions:**

Chiralcel OD column - 250 x 4.6mm - 10 $\mu$ m particle size

Mobile phase - 98% CO<sub>2</sub> 2% methanol

Flow rate - 3.0ml/min, Pressure - 3000psi

Column temperature - 35°C, Detection - UV at 210nm

Retention times:  $t_1$  - 13.12 minutes,  $t_2$  - 14.23 minutes

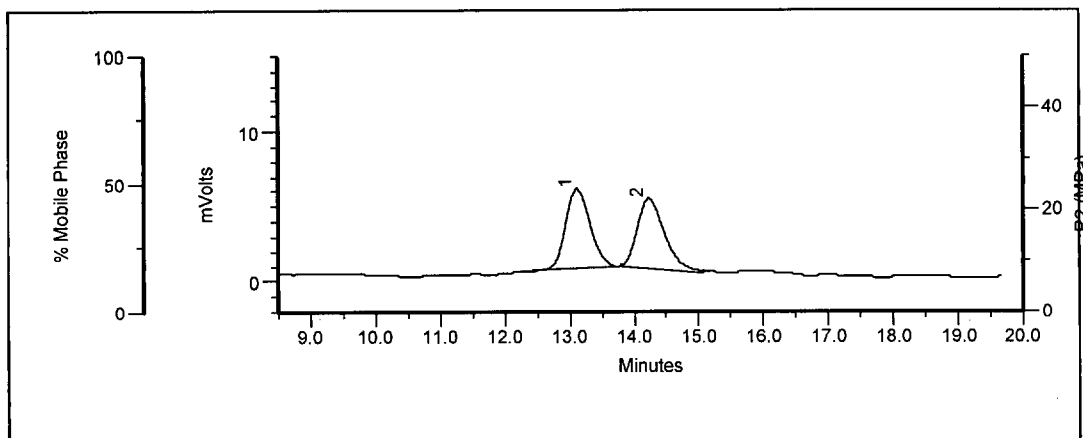

### References for Supporting Information

1. For standard protocol, see Bousquet, E.W.; Carothers, W.H.; McEwen, W.L. *Organic Synthesis*, Coll. Vol. II, Wiley and Sons: New York, 1943, pp. 313-315. For a specific procedure, see, Holmes, A.B.; Smith, A.L.; Williams, S.F.; Hughes, L.R.; Lidert, Z.; Swithenbank, C. *J. Org. Chem.* **1991**, 56, 1393.
2. Fu, S.-C. J; and Birnbaum, S.M. *J. Am. Chem Soc.* **1953**, 75, 918.
3. Manchand, P.S.; Cerruti, R.L.; Martin, J.A.; Hill, C.H.; Merrett, J.H.; Keech, E.; Belshe, R.B.; Connell, E.V.; Sim, I.A. *J. Med. Chem.* **1990**, 33, 1992.
4. Huebner, C.F.; Donoghue, E.M.; Strachan, P.L.; Beak, P.; Wenkert, E. *J. Org. Chem.* **1962**, 27, 4465
5. Drefahl, G.; Ponsold, K. *Chem. Ber.* **1960**, 93, 519.
